# Supplementary material
Source: Elsevier journal article supplement (https://www.sciencedirect.com/science/article/pii/S2605153219301955)

## MATERIAL ADICIONAL

### Anexo 1

#### ***El informe de alta hospitalaria. “Lo que nunca debe faltar”***

*Normas generales: estructura de fácil lectura (evitar siglas no habituales y abreviaturas)*

- Motivo del ingreso y fecha
- Antecedentes personales:
  - Alergias a medicamentos
  - Hábitos de la paciente (tabaco, alcohol, otros)
  - Consumo fármacos (convencionales y no convencionales –fitoterapia, homeopatía,...-)
  - Antecedentes médicos (DM2, HTA, dislipemia, hipotiroidismo, ...) y quirúrgicos.
  - Embarazos previos (fechas y complicaciones si hubo)
- Motivo de alta (fecha):
  - Diagnóstico principal
  - Complicaciones (si las hubiere -durante el embarazo y/o el ingreso-)
- Especificar los resultados analíticos y otros datos de exploración clínica relevantes.
- Establecer objetivos de cuidados específicos:
  - Recomendaciones sobre ejercicio físico y dieta
  - Abstención absoluta del tabaco, evitar consumo de alcohol
  - Seguimiento y controles por parte de matrona
  - Calendario de visitas por medicina de familia: asistencia tras el alta hospitalaria por diabetes gestacional
  - Consejos y recomendación de páginas web consensuadas y avaladas
  - Identificación autor/autores del informe
- El informe de la matrona: con indicaciones de cuidados y visitas programadas.

- Ante cualquier duda siempre es mejor preguntar: teléfonos de contacto (consulta de ginecología, matrona, endocrinología, centro de salud).

## Anexo 2

### ***Instrucciones a las pacientes para el seguimiento de la diabetes gestacional tras el parto***

Estimada Sra.\_\_\_\_\_.

Durante su reciente embarazo usted desarrolló diabetes gestacional. Esta situación condiciona que pueda existir un riesgo futuro de poder presentar diabetes. Es por ello que se considera necesario que se repita la prueba para la diabetes a las 6 semanas después del parto.

#### **Instrucciones:**

Llame a su centro de salud para programar la prueba (tel./cita *online*).

#### **La prueba que necesita hacerse es:**

- Analítica general
- Prueba oral de tolerancia a la glucosa (la prueba tiene una duración de 2 horas y media)

#### **Como se realiza la prueba oral de tolerancia a la glucosa:**

- **Antes del procedimiento.** No podrá comer ni beber nada en las 8 horas previas a la prueba. Sería conveniente que guarde ayuno por la noche y que programe la prueba temprano para la mañana siguiente.
- **Durante el procedimiento.** La prueba de tolerancia a la glucosa se realiza en varias etapas. Cuando llegue al laboratorio se le tomará una muestra de sangre de una vena del brazo. Esta muestra de sangre se usará para medir el nivel de glucosa en sangre en ayunas.
- **Tras la extracción de sangre.** Se le dará a beber un vaso de una solución que contiene 75 gramos de glucosa (azúcar) y 2 horas después se volverá a realizar una extracción de sangre para medir nuevamente los niveles de glucosa en sangre. Durante ese periodo de tiempo deberá estar en reposo, no comer ni fumar.

Una vez finalizada la prueba se le dará cita con su médico para valorar los resultados de la prueba (aproximadamente entre 7-10 días después).

#### **Información importante para usted:**

**¿Qué es la diabetes?** La mayor parte de los alimentos que usted ingiere son metabolizados a glucosa, que proporciona la energía que su cuerpo necesita. Su páncreas produce una hormona llamada insulina que hace que esa glucosa se pueda utilizar por su cuerpo. La diabetes ocurre cuando la glucosa en su sangre esta elevada porque su páncreas no produce suficiente insulina o su cuerpo no está utilizando la insulina debidamente. La glucosa está aumentada en sangre, pero su cuerpo no la puede utilizar de forma adecuada por lo que va condicionar una serie de alteraciones que van a ser perjudiciales para usted.

**¿Por qué necesito esta prueba?** Usted tuvo diabetes gestacional durante su embarazo lo cual la pone en riesgo de desarrollar diabetes en el futuro. Se puede sentir bien ahora, pero si la diabetes no se trata, en un futuro puede resultar en problemas de salud como pueden ser: enfermedad cardiaca, insuficiencia renal, ceguera, derrame cerebral y muerte prematura. Esta prueba de tolerancia de glucosa ayudará a determinar si usted tiene diabetes.

**¿Y si la prueba resulta anormal?** Si la glucosa en su sangre esta elevada pero no lo suficiente como para diagnosticar diabetes, queda la posibilidad que usted tenga prediabetes. Si es así, su médico de familia le aconsejará que al menos una vez al año se repita la prueba. Además, le aconsejará medidas relacionadas con el estilo de vida que ayudarán a proteger su salud.

**¿Y si la prueba es normal?** Por el hecho de haber presentado una diabetes durante su embarazo, usted tiene más probabilidades en el futuro de desarrollar una diabetes que otras mujeres. Por ello, su médico de familia le aconsejará repetir la prueba al menos cada 3 años.

**Informe a su médico.** Es muy importante que acuda a su médico de familia y le comunique que presentó una diabetes durante su embarazo de manera que este la incluya en programa de estudio de la diabetes. Es muy importante que usted lo recuerde.

**¿Qué puedo hacer ahora?** Puede ayudar a prevenir o retardar la diabetes dándole de mamar a su bebé, escogiendo alimentos adecuados y haciendo ejercicio físico entre 30-45 minutos al menos 5 días a la semana.

Podrá encontrar más información en las siguientes páginas web:

- <https://mimocardio.org/mimoembarazo>
- <https://www.pacientesemergen.es/>
- [https://sego.es/Area de la Mujer](https://sego.es/Area_de_la_Mujer)
- <https://www.diabetes.org>
- <https://www.cdc.gov/pregnancy/spanish/diabetes-gestational.html>
- <http://www.seen.es/publico/enfermedades/inicio.aspx>

Tabla 1 del material adicional - Cuestionario para el cribado de riesgo vascular en la mujer

1. ¿Cuántos embarazos ha tenido?
2. ¿Nació alguno de sus bebés antes de tiempo (más de 3 semanas antes de su fecha de parto)?
  - a. ¿Cuántos?
  - b. ¿Ocurrió esto de manera espontánea o fue por algún problema del bebé o del embarazo?
3. ¿Tuvo preeclampsia en alguno de sus embarazos?
  - a. ¿En cuál?
  - b. ¿Cuántas veces?
  - c. ¿El parto se adelantó porque tuviste preeclampsia?
  - d. ¿Cuántas semanas antes de la fecha prevista?
4. ¿Tuvo presión arterial alta en algún embarazo?
  - a. ¿Tuvo proteínas en tu orina en ese embarazo?
  - b. ¿Tuvo hipertensión después de ese embarazo?
5. ¿Cuál fue el peso de sus bebés y cuántas semanas antes de la fecha prevista?
6. ¿Tuvo diabetes gestacional durante sus embarazos?

**Figura 1 del material adicional - Algoritmo de seguimiento tras el parto en la mujer con estados hipertensivos durante el embarazo. MAPA: monitorización ambulatoria de presión arterial de 24 h; PA: presión arterial.**

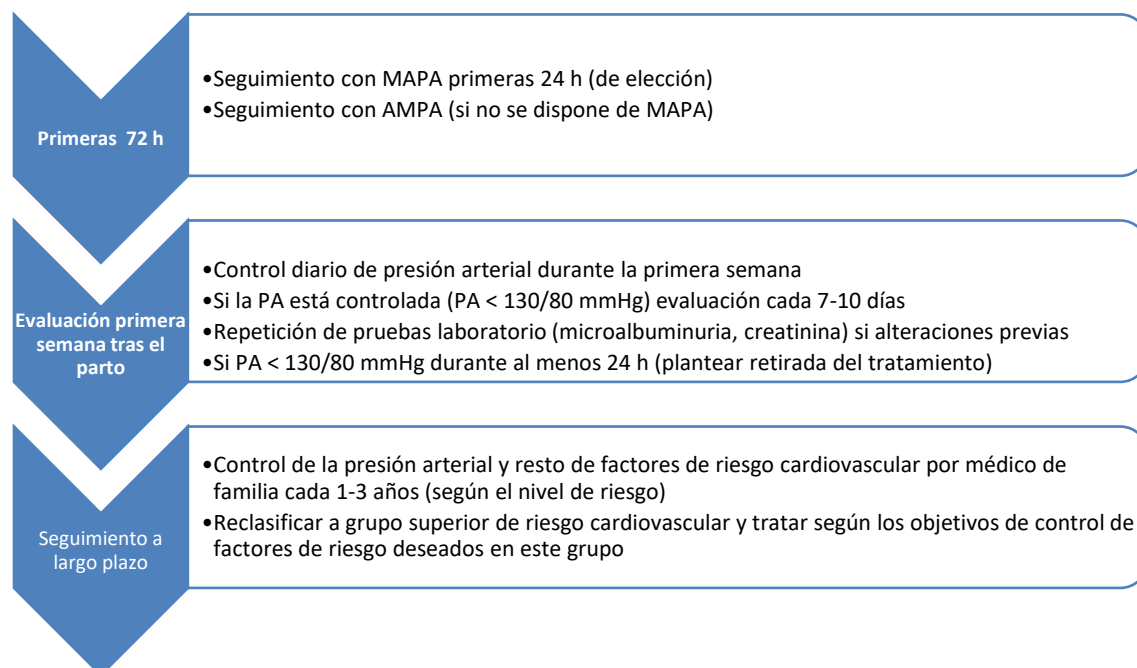

**Figura 2 del material adicional - Algoritmo de seguimiento tras el parto en la mujer con diabetes gestacional. DM2: diabetes mellitus 2.**

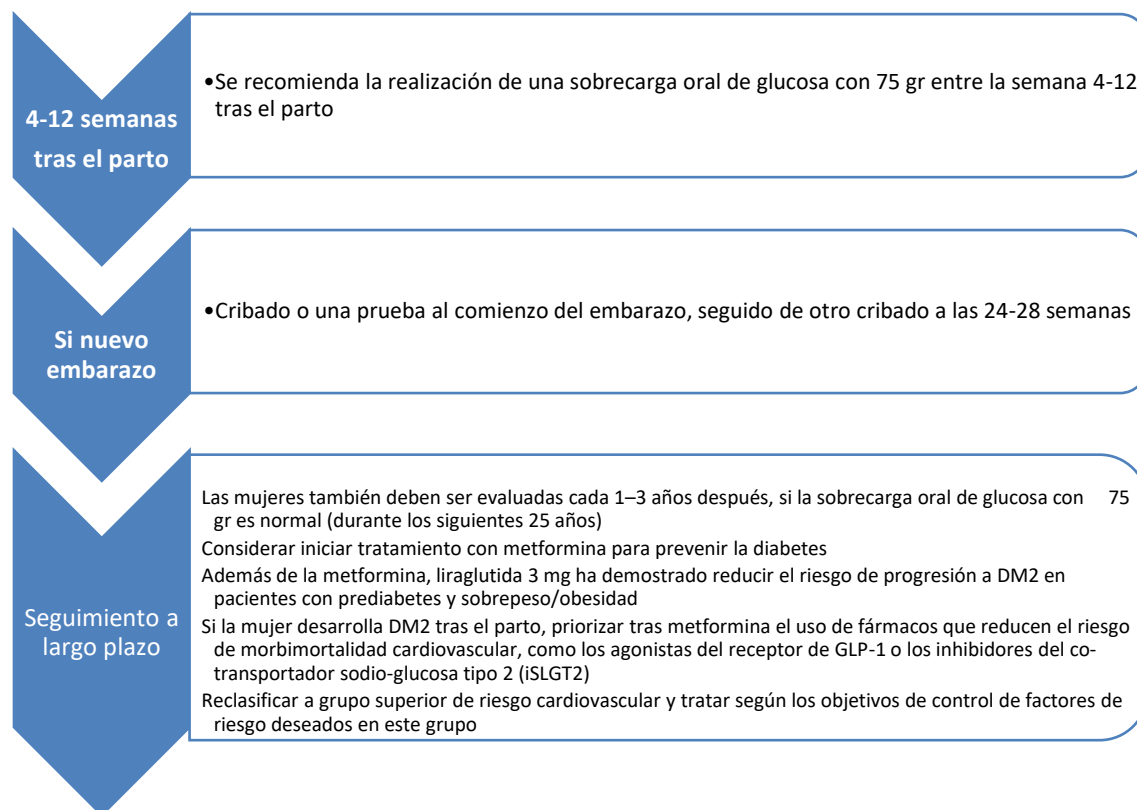



**Figura 3 del material adicional – Algoritmo de seguimiento tras el parto de la mujer con obesidad.**  
**IMC: índice de masa corporal.**

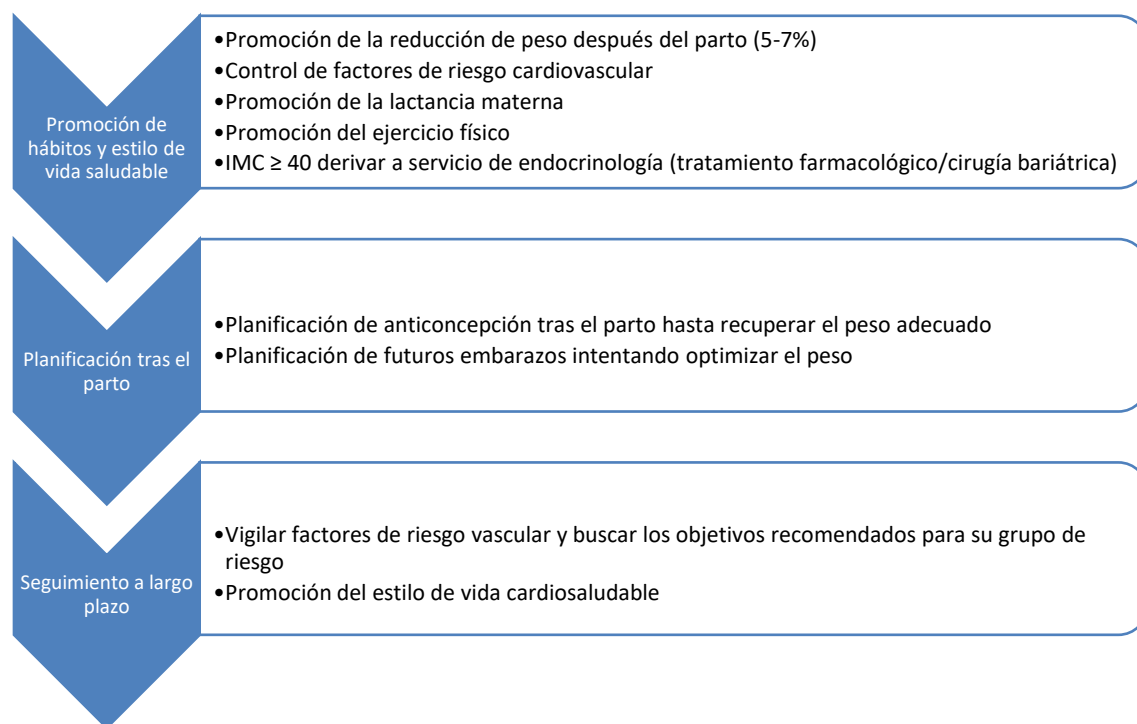

Supplement: mmc1 [file S2605153219301955:mmc1.pdf]
